# Supplementary material for: Construction of pH/reduction dual responsive MSN-HAgel containing HApt for tumor targeting carriers
Source: Royal Society of Chemistry journal article supplement (doi:10.1039/d2ra02290g), 2022-01-01
Supplement: d2ra02290g1.pdf [file d2ra02290g1.pdf]

## Supporting information

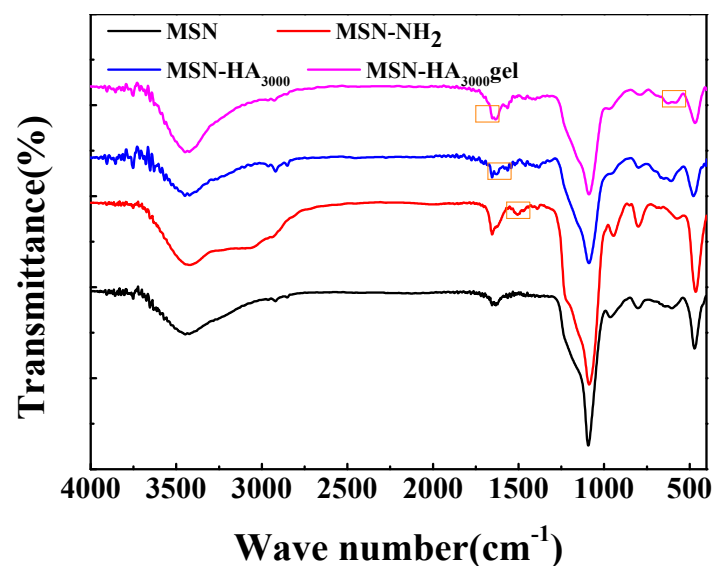

A

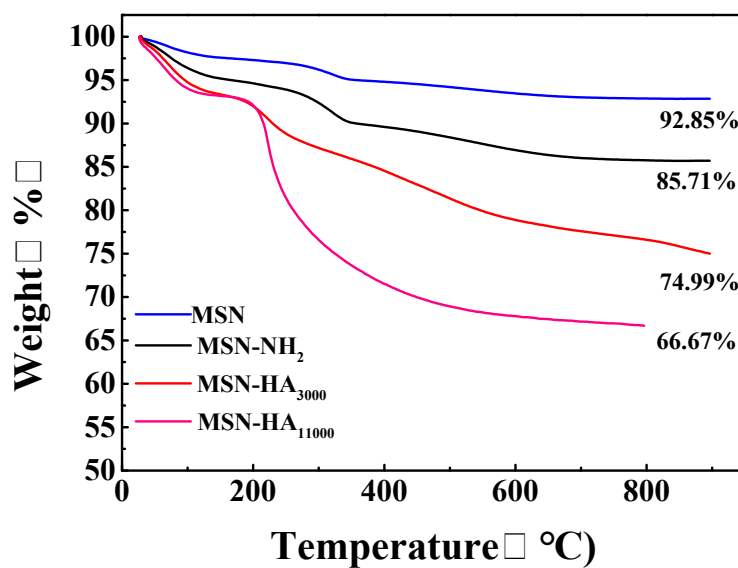

B

Fig.S1 FTIR spectra (A) of MSN, MSN-NH<sub>2</sub> and MSN-HA<sub>3000</sub> and TGA curves (B) of MSN-HA<sub>3000</sub>gel and MSN-HA<sub>11000</sub>gel.

All the four curves in Fig.S1A showed strong broad peaks at 1100 cm<sup>-1</sup>, which were the stretching vibration peak of Si-O-Si of MSN. Peaks near 1600 cm<sup>-1</sup> and 1526 cm<sup>-1</sup> appeared in the MSN-NH<sub>2</sub> curve, which were the flexural vibration peak and the stretching vibration peak of the primary amine, indicating that the -NH<sub>2</sub> group was modified onto MSN. The peak at 1625.6 cm<sup>-1</sup> on MSN-HA curve was the characteristic

absorption peak of C=O of HA and the characteristic absorption peak of amino group at  $1526\text{ cm}^{-1}$  was weakened. The characteristic absorption peaks of the amide I bond at  $1655\text{ cm}^{-1}$  and the disulfide bond at  $550\text{ cm}^{-1}$  indicate the successful crosslinking and the successful modification of the HApt molecule.

Thermogravimetric analysis in Fig.S1B showed that the residual mass fractions of MSN-NH<sub>2</sub> and MSN were 92.85% and 85.71% respectively, indicating that the grafting mass rate of amino groups was about 7.14%. The residual mass fraction of MSN-HA<sub>3000</sub> was 74.99%, indicating that the grafted amount of HA was about 10.72%. Similarly, the grafted HA<sub>11000</sub> was 19.1%.

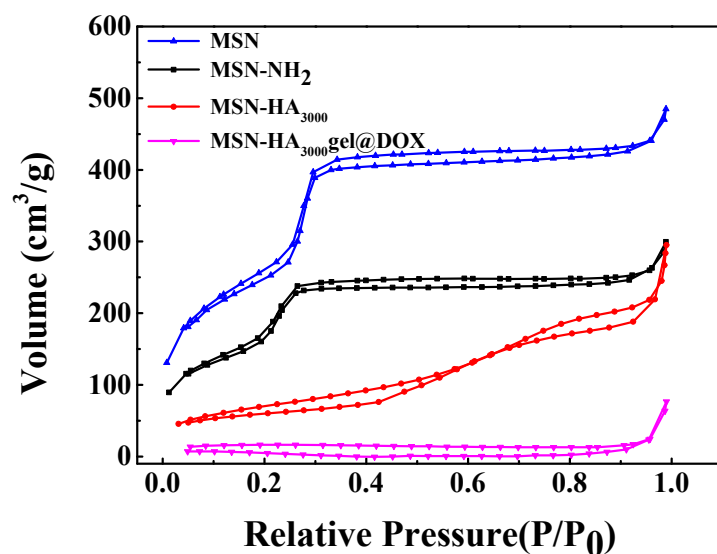

A

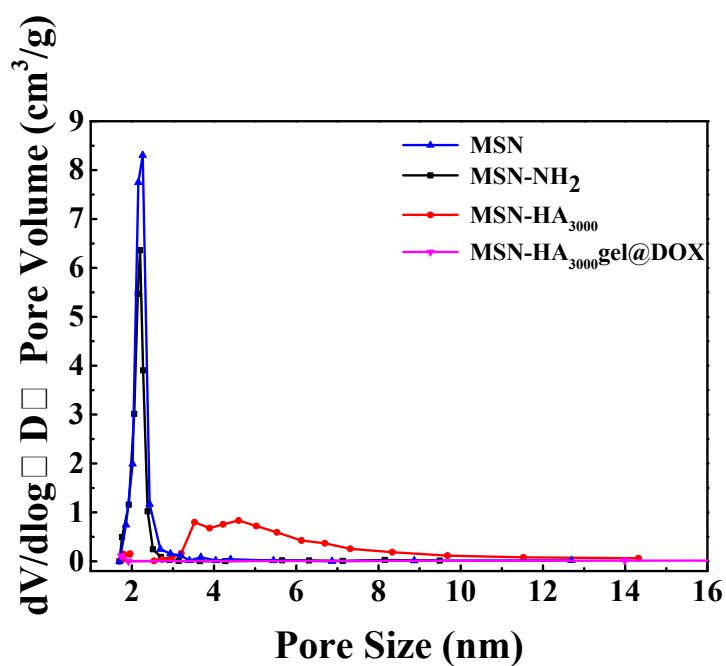

B

Fig.S2 BET nitrogen adsorption/desorption isotherms (A) and BJH pore size distributions (B) for MSN, MSN-NH<sub>2</sub>, MSN-HA<sub>3000</sub> and MSN-HA<sub>3000</sub> gel @DOX.

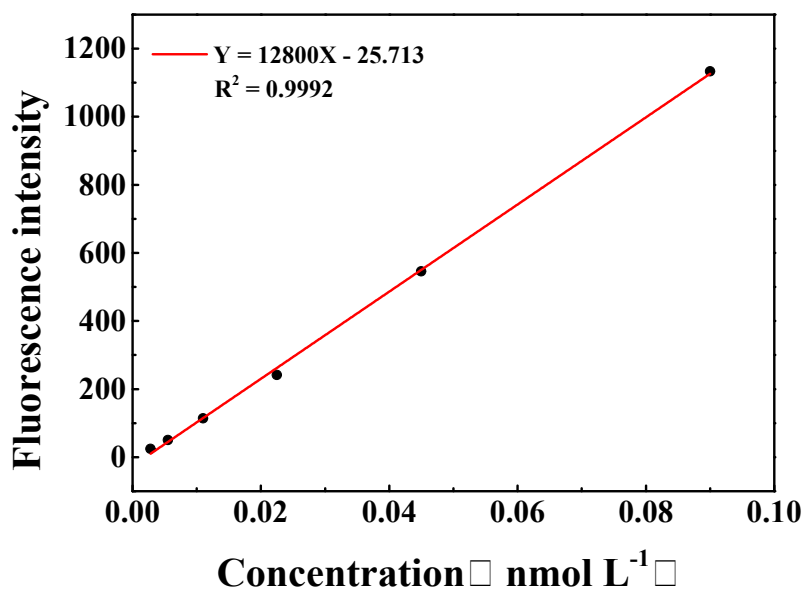

A

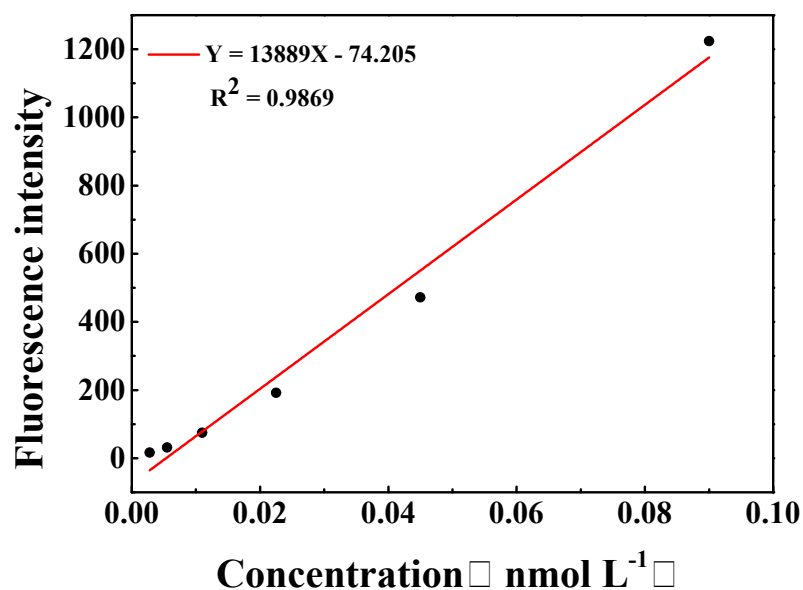

B

Fig.S3 Fluorescence standard curve of Texas red-HApt-SH at pH=7.4(A) and 5.0(B)

Table.S1 Properties of MSN, MSN-NH<sub>2</sub>, MSN-HA and MSN-HAgel.

| Samples             | Diameter (nm) | PDI         | ζ-potential (mV) |
|---------------------|---------------|-------------|------------------|
| MSN                 | 200.4±4.2     | 0.269±0.030 | -30.0±0.4        |
| MSN-NH <sub>2</sub> | 212.8± 4.0    | 0.470±0.002 | 41.6±0.8         |

|                             |            |             |           |
|-----------------------------|------------|-------------|-----------|
| MSN-HA <sub>3000</sub>      | 230.9±4.6  | 0.155±0.015 | -15±0.1   |
| MSN-HA <sub>3000</sub> gel  | 220.0± 6.1 | 0.670±0.016 | -12.8±1.4 |
| MSN                         | 91.8±2.1   | 0.245±0.025 | -32.8±1.1 |
| MSN-NH <sub>2</sub>         | 101.8± 2.0 | 0.319±0.012 | 43.2±2.0  |
| MSN-HA <sub>11000</sub>     | 131.2±4.8  | 0.177±0.011 | -31.1±2.1 |
| MSN-HA <sub>11000</sub> gel | 112.1± 3.0 | 0.555±0.026 | -22.4±3.3 |

**. Table.S2 The average encapsulation efficiency and drug loading efficiency of MSN-HAgel**

| Samples                                           | Drug-loading content<br>(DLC) | Drug encapsulation efficiency<br>(DEE) |
|---------------------------------------------------|-------------------------------|----------------------------------------|
| MSN-HA <sub>3000</sub> gel (pH7.4 <sup>#</sup> )  | 24.7                          | 2.2                                    |
| MSN-HA <sub>3000</sub> gel (pH8.5 <sup>#</sup> )  | 71.6                          | 6.7                                    |
| MSN-HA <sub>11000</sub> gel (pH8.5 <sup>#</sup> ) | 69.3                          | 6.3                                    |

<sup>#</sup>: the pH used when DOX loading
